# Supplementary material
Source: MDPI journal article supplement (https://www.mdpi.com/1996-1073/17/1/109)
Supplement: s1 [file s1]

## Supplementary Data

# Analyzing the Effect of Nano-Sized Conductive Additive Content on Cathode Electrode Performance in Sulfide All-Solid-State Lithium-Ion Batteries

Jae Hong Choi<sup>1</sup>, Sumyeong Choi<sup>1</sup>, Tom James Embleton<sup>1</sup>, Kyungmok Ko<sup>1</sup>, Kashif Saleem Saqib<sup>1</sup>, Jahanzaib Ali<sup>1</sup>, Mina Jo<sup>1</sup>, Junhyeok Hwang<sup>1</sup>, Sungwoo Park<sup>1</sup>, Minhu Kim<sup>1</sup>, Mingi Hwang<sup>1</sup>, Heesoo Lim<sup>1</sup> and Pilgun Oh<sup>\*1,2</sup>

<sup>1</sup> Department of Smart Green Technology Engineering, Pukyong National University, 45, Yongso-ro, Nam-gu, Busan 48547, Republic of Korea

<sup>2</sup> Department of Nanotechnology Engineering, Pukyong National University, 45, Yongso-ro, Nam-gu, Busan 48547, Republic of Korea

\*Correspondence: E-mail addresses: poh@pknu.ac.kr; Tel.: +82-51-629-6387; Fax: +82-51-629-6388

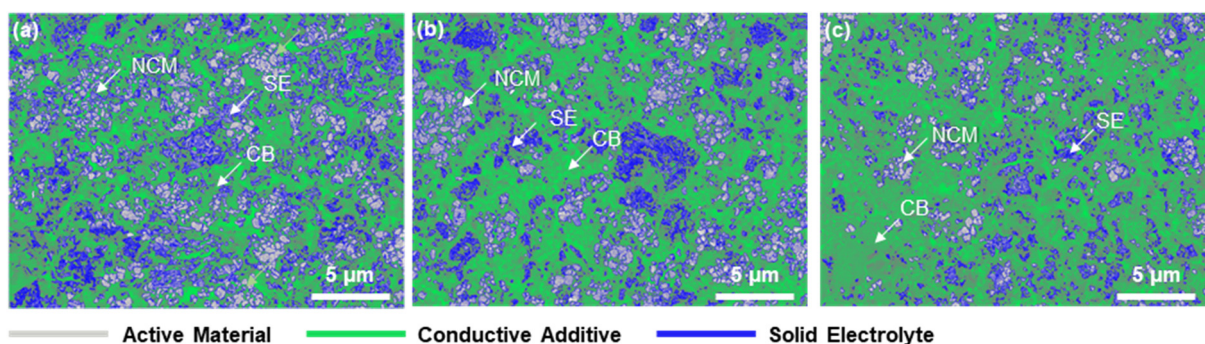

**Figure S1.** Scanning electron microscopy (SEM) images of the surface of (a) 3 wt%, (b) 5 wt%, and (c) 7 wt% carbon black (CB) composites after pelletizing with the look-up table (LUT) color gradient altered to better display the 3 components of the cathode composite.

### Image Processing Methods

ImageJ software was used to process the scanning electron microscopy images. The images were edited using the Color-LUT function to directly map the new colors that were selected onto the previously gray gradient of the SEM imaging. The colors were automatically mapped and had no user input aside from the color selection.

**Table S1.** The properties and impact of applying of various carbon additives, as characterized in previous work.

| Properties       |            |              |              |                    | Impact                                |                            |
|------------------|------------|--------------|--------------|--------------------|---------------------------------------|----------------------------|
| Carbon Additive  | Dispersion | Surface Area | Graphiticity | Stability with SSE | Key advantages                        | Key disadvantage           |
| Carbon Black     | High       | High         | Low          | Low                | Good electrical network               | Large CB/SE contact        |
| Carbon Nanofiber | Low        | Low          | High         | High               | Low CNF/SE contact                    | Poor electrical network    |
| Carbon Nanotube  | Medium     | Medium       | High         | Low                | Capable of coating on active material | Agglomeration difficulties |

**Table S2.** The charge–discharge capacities, te irreversible capacities, and coulombic efficiencies (CEs) of 3 wt%, 5 wt%, and 7 wt% CB composites conducted at 0.5 C for the 1st, 10<sup>th</sup>, 20<sup>th</sup>, 30<sup>th</sup>, 40<sup>th</sup>, and 50<sup>th</sup> cycles.

| Electrochemical Analysis      | 3wt% CB   |            |            |            |            |            | 5wt% CB   |            |            |            |            |            | 7wt% CB   |            |            |            |            |            |
|-------------------------------|-----------|------------|------------|------------|------------|------------|-----------|------------|------------|------------|------------|------------|-----------|------------|------------|------------|------------|------------|
|                               | 1st Cycle | 10th Cycle | 20th Cycle | 30th Cycle | 40th Cycle | 50th Cycle | 1st Cycle | 10th Cycle | 20th Cycle | 30th Cycle | 40th Cycle | 50th Cycle | 1st Cycle | 10th Cycle | 20th Cycle | 30th Cycle | 40th Cycle | 50th Cycle |
| Charge Capacity (mAh/g)       | 176       | 132        | 121.8      | 112        | 104        | 97         | 182       | 131        | 120        | 111        | 104        | 98         | 190       | 134        | 119        | 105        | 88.6       | 70.3       |
| Discharge Capacity (mAh/g)    | 145       | 130        | 119.8      | 111        | 103        | 96         | 149       | 130        | 119        | 110        | 103        | 97.1       | 153       | 132        | 117        | 102        | 85.9       | 68.4       |
| Irreversible Capacity (mAh/g) | 30.5      | 2.26       | 1.985      | 1.58       | 1.23       | 1.1        | 33.2      | 1.4        | 1.03       | 1.1        | 1          | 0.87       | 36.6      | 2          | 2.4        | 2.7        | 2.68       | 1.93       |
| Coulombic Efficiency (%)      | 82.6      | 98.3       | 98.37      | 98.6       | 98.8       | 99         | 81.7      | 99         | 99.1       | 99         | 99         | 99.1       | 80.8      | 98         | 98         | 97         | 97         | 97.3       |

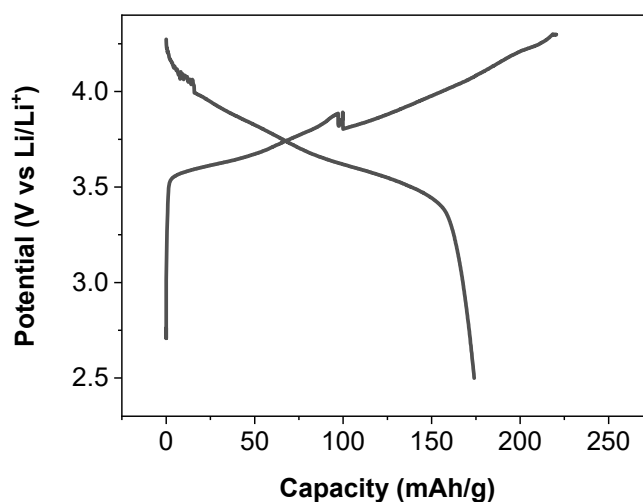

**Figure S2.** (a) Electrochemical performance of 0 wt% CB composite for the formation (initial charge–discharge) voltage profiles in a voltage range of 2.5–4.3 V at 0.05C.

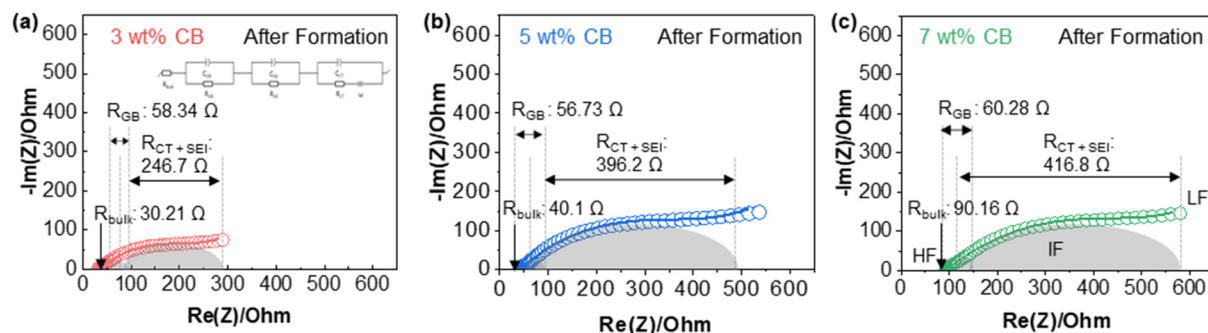

**Figure S3.** Nyquist plots (0.1 Hz –100 kHz) and their fittings for (a) 3 wt%, (b) 5 wt%, and (c) 7 wt% CB composites comparing results obtained after formation at 0.05C.

**Table S3.** Solid electrolyte bulk resistance ( $R_b$ ), cathode electrolyte interphase resistance ( $R_{\text{GB}}$ ), and charge transfer resistance ( $R_{\text{CT}}$ ) of 3 wt%, 5 wt%, and 7 wt% CB composites after formation at 0.05C determined via electrochemical impedance spectroscopy (EIS).

| Sample          |          | $R_{\text{bulk}}$<br>( $\Omega$ ) | $R_{\text{GB}}$<br>( $\Omega$ ) | $R_{\text{CT} + \text{SEI}}$<br>( $\Omega$ ) |
|-----------------|----------|-----------------------------------|---------------------------------|----------------------------------------------|
| After formation | 3 wt% CB | 30.2                              | 58.3                            | 246.7                                        |
|                 | 5 wt% CB | 40.1                              | 56.7                            | 396.2                                        |
|                 | 7 wt% CB | 90.2                              | 60.3                            | 416.8                                        |

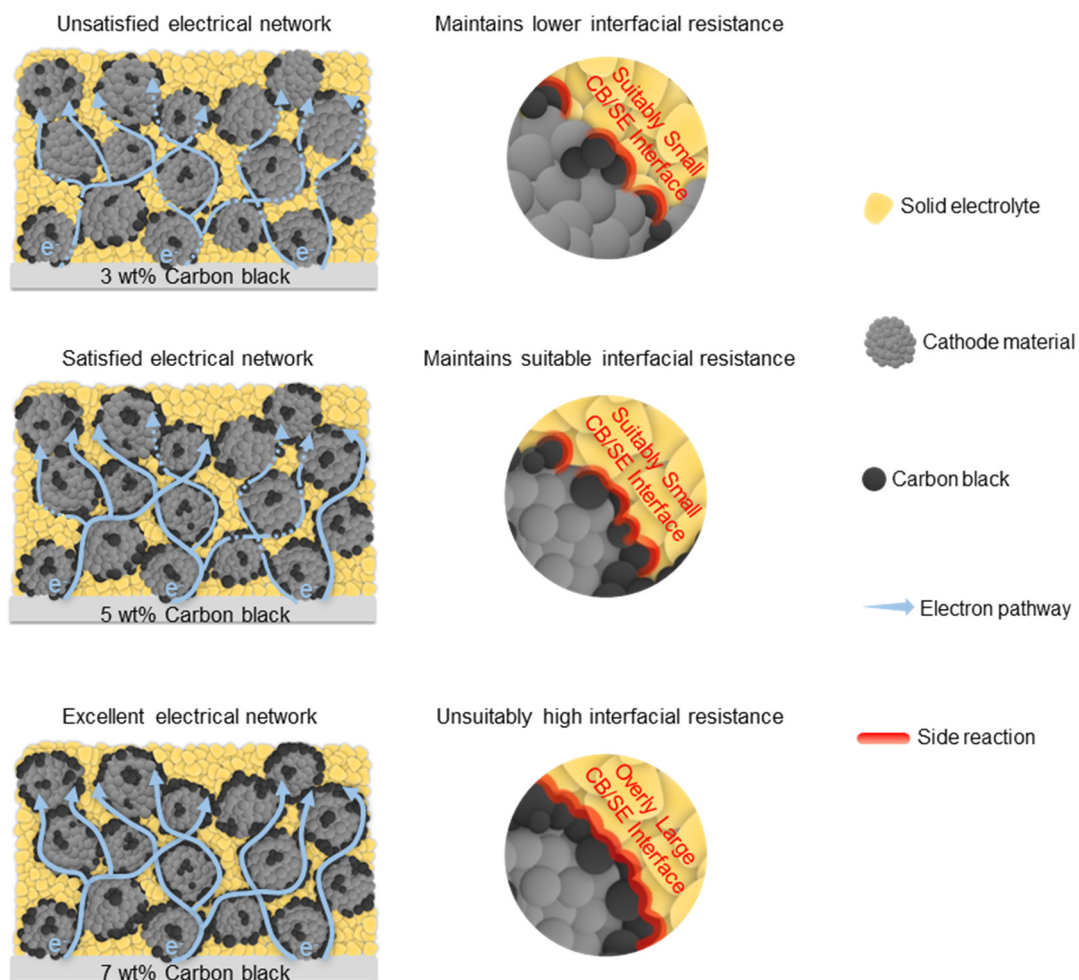

**Figure S4.** Scheme showing the importance of electrical conductivity of the cathode electrode and the corresponding interfacial resistance between carbon materials and solid electrolyte from inclusion of 3 wt%, 5 wt%, and 7 wt% CB.
